# Supplementary material for: Glycosylation of the antimicrobial peptide LL-III: Effects on membrane perturbation, protease stability, and biological activity
Source: Research Square preprint supplement (doi:10.21203/rs.3.rs-2373913/v1), 2022-12-20
Supplement: Supplementary file 1 [file 0b684b32308839e47433beab.docx]

**Supporting Information**

**Glycosylation of the antimicrobial peptide LL-III: Effects on membrane perturbation, protease stability, and biological activity**

Attila Tortorella1,#, Linda Leone1, Angelina Lombardi1, Elio Pizzo2, Andrea Bosso2, Roland Winter3, Luigi Petraccone1, Pompea Del Vecchio1,* and Rosario Oliva1,*

1 Department of Chemical Sciences, University of Naples Federico II, Via Cintia 4, I-80126, Naples, Italy

2 Department of Biology, University of Naples Federico II, Via Cintia 4, I-80126, Naples, Italy

3 Department of Chemistry and Chemical Biology, Biophysical Chemistry, TU Dortmund University, Otto-Hahn-Str. 4a, D-44227, Dortmund, Germany

# Present address: Scuola Superiore Meridionale (SSM), Largo San Marcellino 10, I-80138, Naples, Italy

Corresponding authors: [pompea.delvecchio@unina.it](mailto:pompea.delvecchio@unina.it) (P.D.V.), [rosario.oliva2@unina.it](mailto:rosario.oliva2@unina.it) (R.O.)

*

*

**Figure S1** RP-HPLC chromatogram at l = 210 nm of crude LL-III peptide. The desired product is eluted at RT = 25.80 min (yield = 58%).


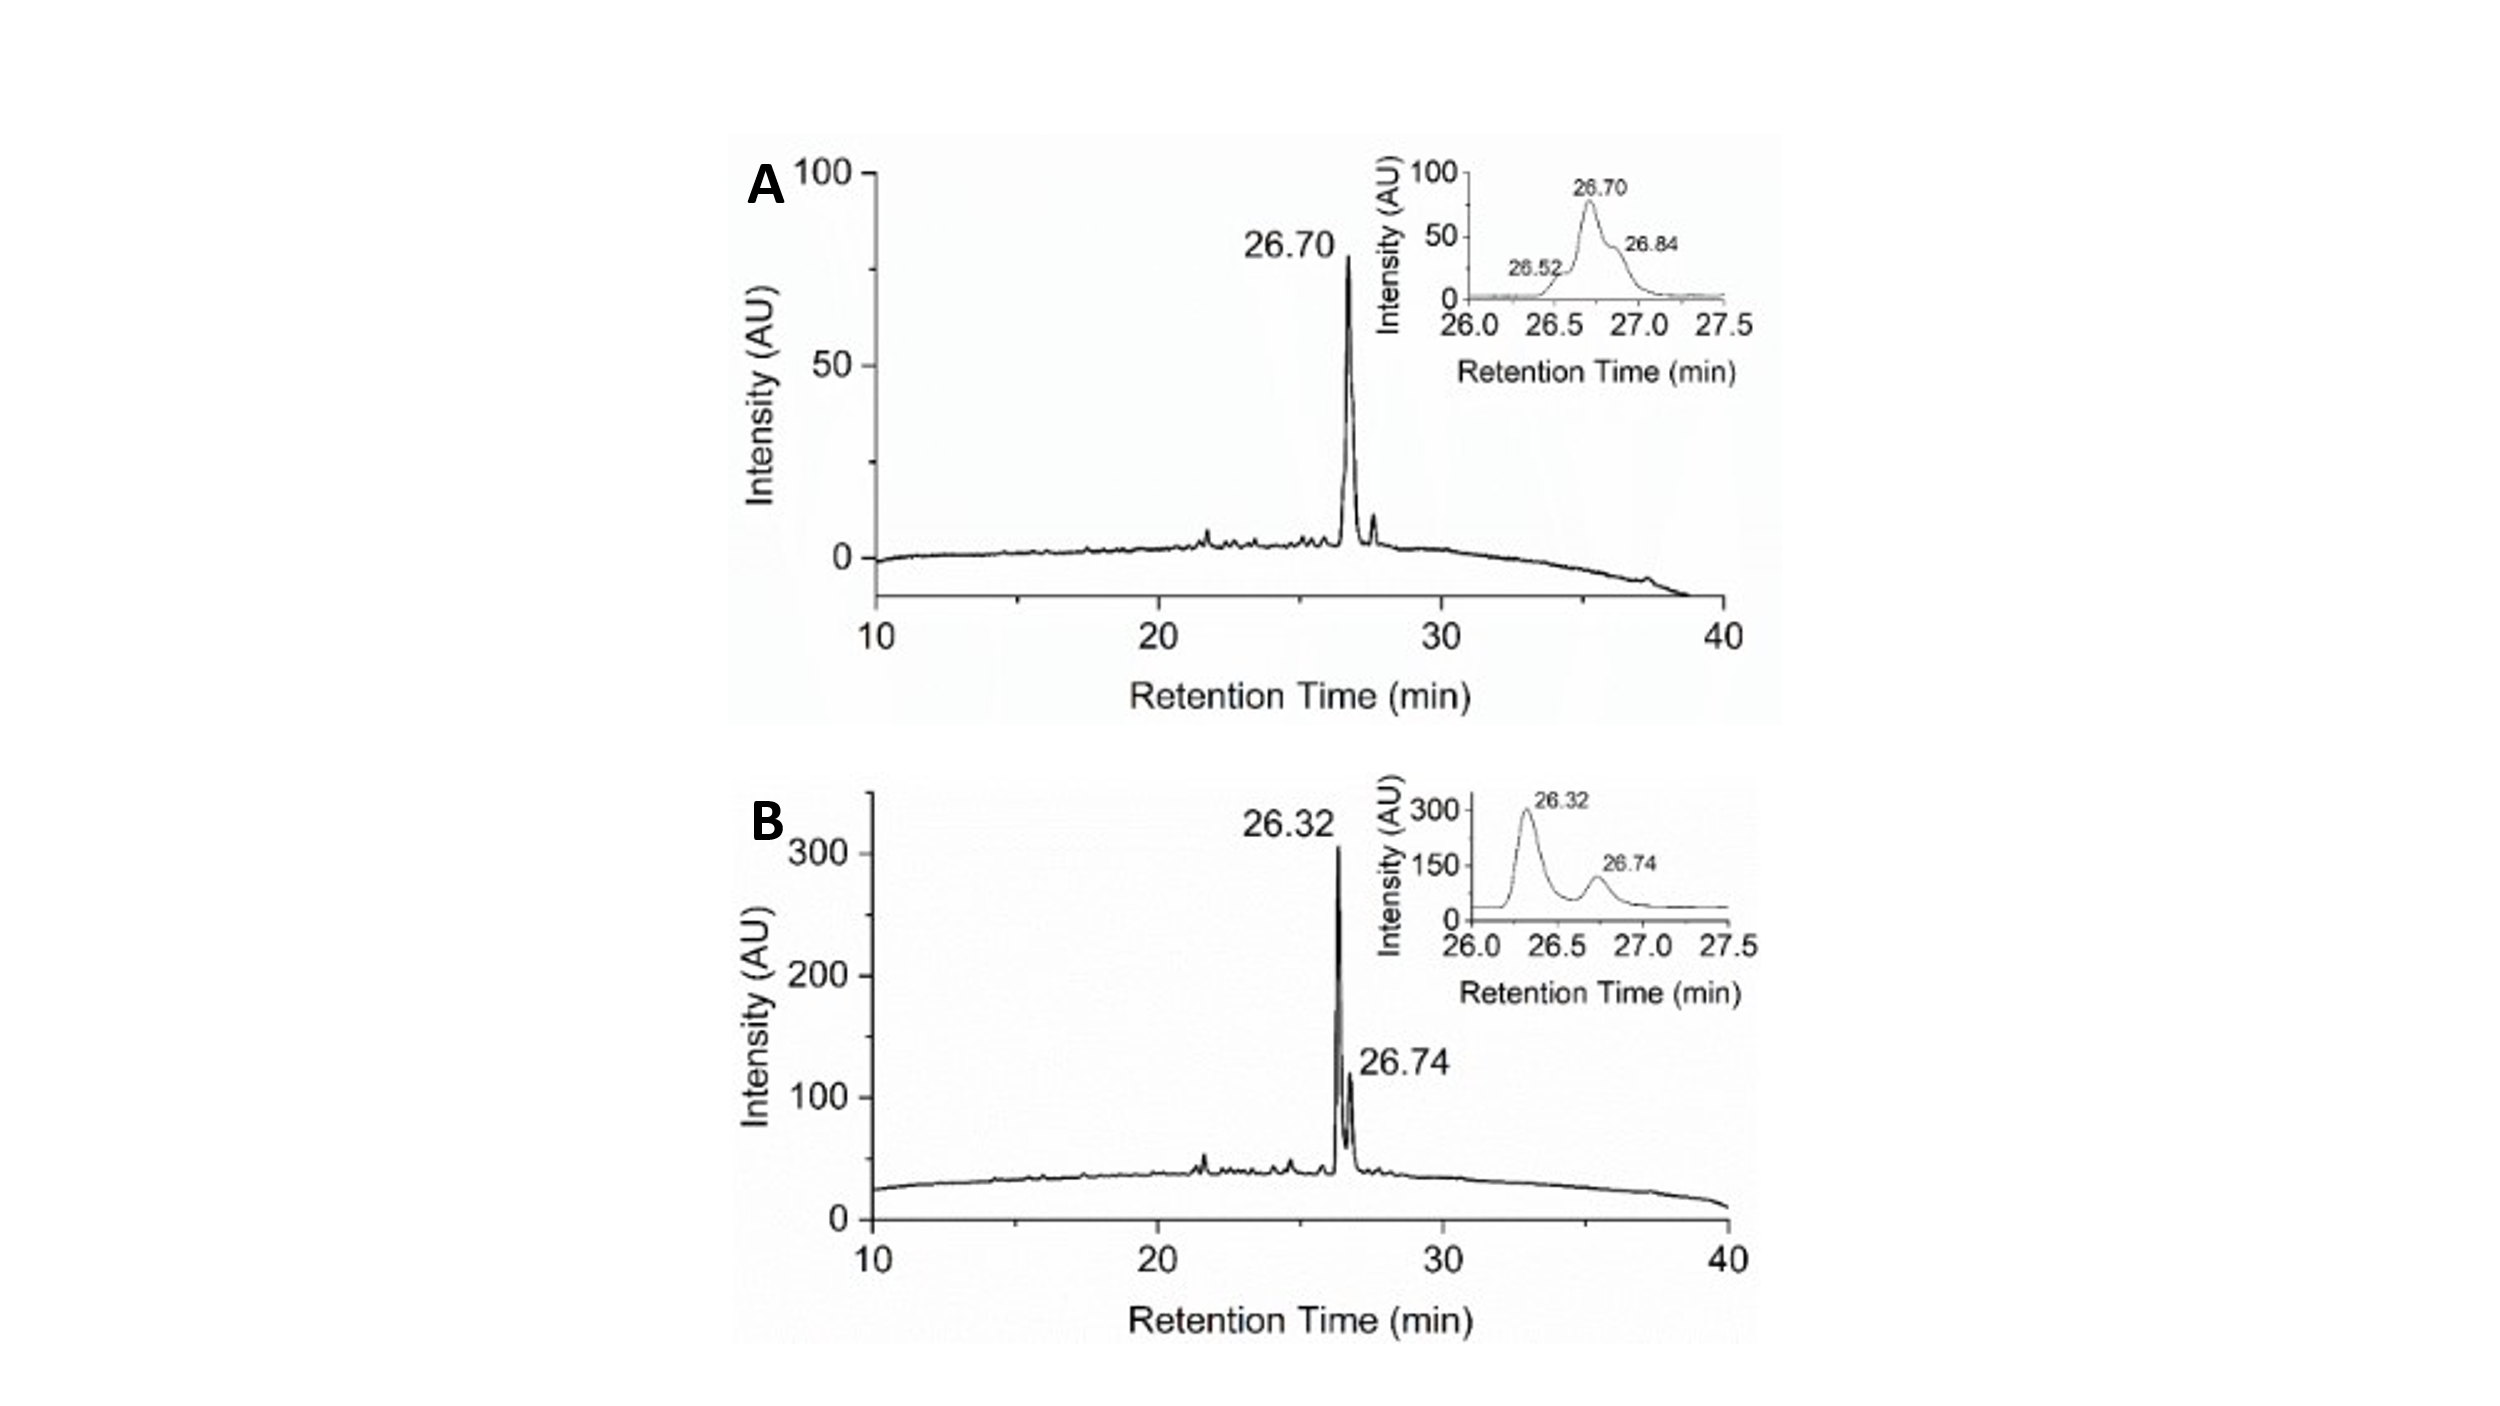


**Figure S2** RP-HPLC chromatograms at l = 210 nm of crude g-LL-III peptide before (A) and after (B) sugar deprotection. The insets show the main peaks in detail. The fully deprotected product is eluted at RT = 26.32 min (yield = 63%).

*

*

**Figure S3** RP-HPLC chromatograms at l = 210 nm of pure LL-III peptide.

*

*

**Figure S4** ESI-MS spectrum of LL-III peptide. The signal at m/z = 589.4 Th corresponds to the [M+3H+]3+ ion and the signal at m/z = 883.0 Th corresponds to the [M+2H+]2+ ion. The derived experimental isotopic mass (1764.6 ± 0.6 Da) is in agreement with the theoretical value of 1764.2 Da.

*

*

**Figure S5** RP-HPLC chromatograms at l = 210 nm of pure g-LL-III peptide.

*

*

**Figure S6** ESI-MS spectrum of g-LL-III peptide. The signal at m/z = 657.1 Th corresponds to the [M+3H+]3+ ion and the signal at m/z = 985.3 Th corresponds to the [M+2H+]2+ ion. The derived experimental isotopic mass (1968.4 ± 0.2 Da) is in agreement with the theoretical value of 1968.3 Da.

**
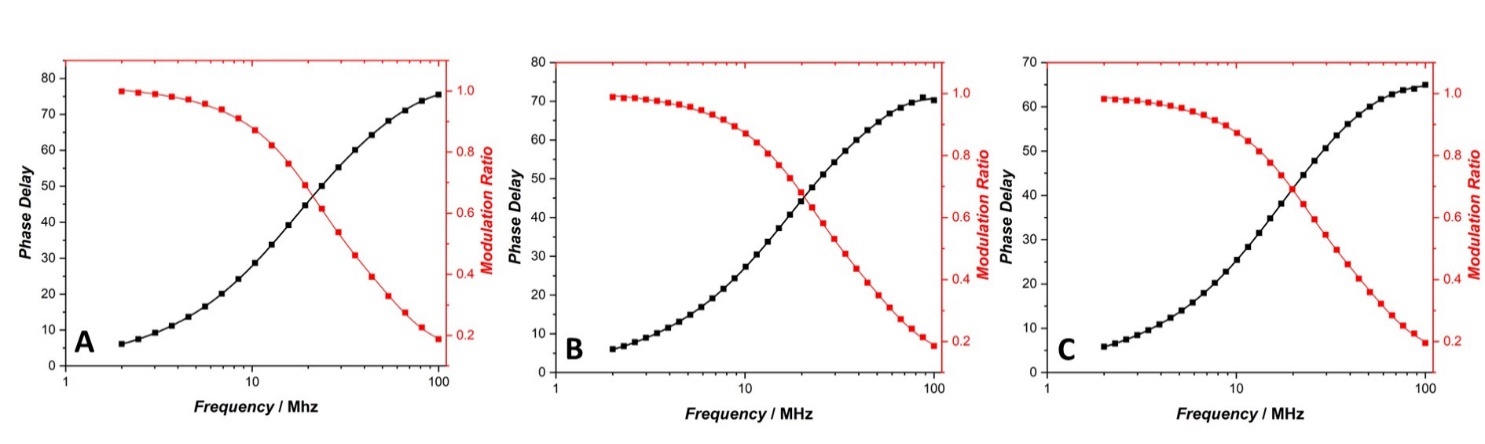
**

**Figure S7** Frequency responses (phase and modulation) of DPH (1.4 µM) embedded in POPC/POPG LUVs (50 µM), in the absence (A) and in the presence of (B) g-LL-III and (C) LL-III, at L/P = 10. The excitation was from a 370-nm LED laser. The emission was collected through a 395 nm long-pass filter. Dimethyl-POPOP was used as standard (τ = 1.45 ns). The data are best fitted with two decay times (with χ2 equals to 0.456, 0.901 and 1.464 for the experiments carried out in the absence of peptides, in the presence of g-LL-III and in the presence of LL-III, respectively).

**Figure S8** Kinetics of the hydrolysis of the substrate AAF-AMC performed by the enzyme α-chymotrypsin. Black line is the hydrolysis of AAF-AMC in neat buffer. The red and blue lines are instead the reaction carried in the presence of and g-LL-III, respectively. All the experiments were performed at 25°C in 10 mM phosphate buffer, pH 7.4.
